# Supplementary material for: Interindividual Differences in In Vitro Human Intestinal Microbial Conversion of 3-Acetyl-DON and 15-Acetyl-DON
Source: MDPI journal article supplement (doi:10.3390/toxins14030199), 2022-03-07
Supplement: s1 [file s1]

# Interindividual Differences in In Vitro Human Intestinal Microbial Conversion of 3-acetyl-DON and 15-acetyl-DON

Fangfang Li <sup>1,†</sup>, Jing Jin <sup>1,2,†</sup>, Ivonne M. C. M. Rietjens <sup>2</sup> and Fuguo Xing <sup>1,\*</sup>

<sup>1</sup> Institute of Food Science and Technology, Chinese Academy of Agricultural Sciences/Key Laboratory of Agro-Products Quality and Safety Control in Storage and Transport Process, Ministry of Agriculture and Rural Affairs of P. R. China, 2 Yuanmingyuan West Road, Haidian District, Beijing 100193, China; 1742240749@163.com (F.L.); jinjing@caas.cn (J.J.)

<sup>2</sup> Division of Toxicology, Wageningen University and Research, Stippeneng 4, 6708 WE Wageningen, The Netherlands; ivonne.rietjens@wur.nl

\* Correspondence: xingfuguo@caas.cn

† These authors contribute equally to this work.

**Table S1.** Information for the individual fecal samples collected in this study.

| Individual | Gender | Age |
|------------|--------|-----|
| 1          | M      | 26  |
| 2          | M      | 25  |
| 3          | F      | 25  |
| 4          | F      | 25  |
| 5          | F      | 25  |
| 6          | F      | 24  |
| 7          | F      | 25  |
| 8          | F      | 26  |
| 9          | F      | 25  |
| 10         | M      | 30  |
| 11         | M      | 26  |
| 12         | F      | 24  |
| 13         | F      | 26  |
| 14         | F      | 25  |
| 15         | M      | 27  |
| 16         | F      | 25  |
| 17         | F      | 25  |
| 18         | F      | 25  |
| 19         | F      | 25  |
| 20         | M      | 26  |
| 21         | F      | 25  |
| 22         | F      | 25  |
| 23         | F      | 25  |
| 24         | F      | 25  |
| 25         | F      | 24  |

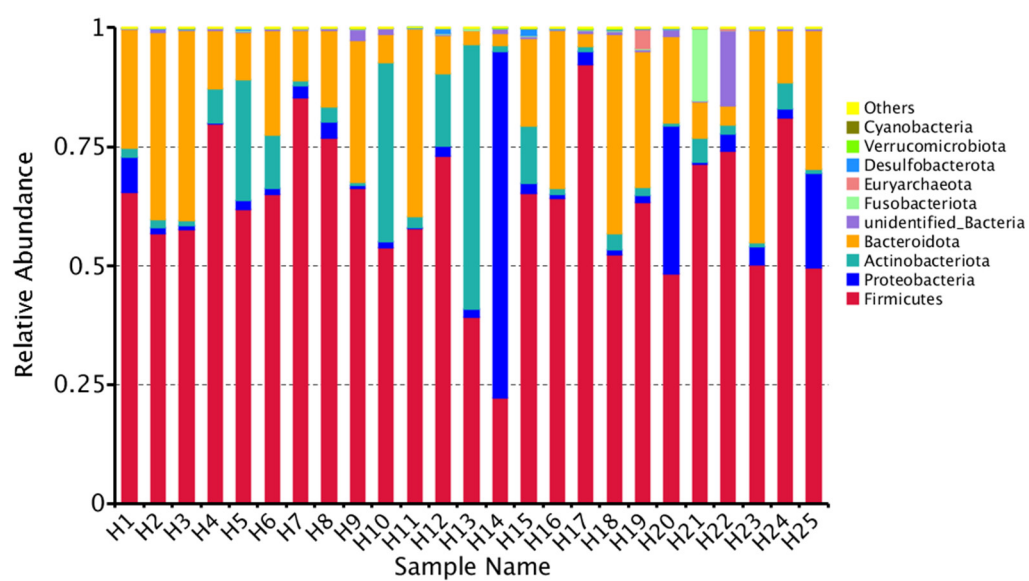

**Figure S1.** Analysis of the microbiome relative abundance of species at the phylum level in individual human samples.
